# Supplementary material
Source: PubMed Central journal article supplement (PMC6187439)

**Table S1.** Distribution of treatment access and screening results using the Iterative Classification Tree model.

| group      | n    | Treated      |              |              |                 | Untreated    |             |              |                 |
|------------|------|--------------|--------------|--------------|-----------------|--------------|-------------|--------------|-----------------|
|            |      | Not screened | Flagged      | Unclassified | Screen negative | Not screened | Flagged     | Unclassified | Screen negative |
| Total      | 7965 | 5.4%         | 12.5%        | 5.6%         | 7.1%            | 12.0%        | 9.3%        | 10.4%        | 37.8%           |
| Men        | 7455 | 5.1%         | 11.5%        | 5.4%         | 7.0%            | 11.8%        | 9.4%        | 10.6%        | 39.2%           |
| Women      | 510  | <b>10.0%</b> | <b>26.7%</b> | <b>8.8%</b>  | 8.4%            | 14.5%        | 7.7%        | <b>6.7%</b>  | <b>17.3%</b>    |
| White      | 4676 | 5.1%         | 13.7%        | 6.3%         | 7.7%            | <b>8.4%</b>  | 9.9%        | 10.0%        | 39.0%           |
| Indigenous | 1860 | 7.1%         | 14.5%        | 5.5%         | 7.6%            | 15.1%        | 10.7%       | 10.3%        | 29.2%           |
| Black      | 677  | 4.3%         | <b>5.9%</b>  | <b>2.7%</b>  | <b>3.8%</b>     | <b>18.2%</b> | <b>5.9%</b> | 13.4%        | <b>45.8%</b>    |
| Other      | 752  | 4.4%         | <b>5.9%</b>  | <b>4.0%</b>  | 5.5%            | <b>21.0%</b> | <b>5.5%</b> | 10.1%        | <b>43.8%</b>    |
| Atlantic   | 885  | <b>3.2%</b>  | <b>19.8%</b> | 6.7%         | 5.8%            | <b>5.7%</b>  | 13.2%       | 12.3%        | 33.5%           |
| Quebec     | 2193 | <b>3.7%</b>  | <b>9.2%</b>  | <b>3.8%</b>  | 6.0%            | <b>7.3%</b>  | 9.7%        | 10.4%        | <b>49.9%</b>    |
| Ontario    | 1570 | 8.2%         | 15.7%        | 7.9%         | 9.8%            | 15.2%        | <b>4.3%</b> | <b>7.3%</b>  | 31.8%           |
| Prairie    | 2550 | 6.5%         | 11.4%        | 6.2%         | 8.2%            | 14.8%        | 9.5%        | 10.6%        | 32.9%           |
| Pacific    | 767  | <b>4.0%</b>  | 10.4%        | <b>2.6%</b>  | <b>2.9%</b>     | 16.6%        | 13.6%       | 13.6%        | 36.4%           |
| 18-24      | 1614 | 4.7%         | 12.1%        | 5.8%         | 7.0%            | 12.6%        | 9.3%        | 12.8%        | 35.6%           |
| 25-39      | 3638 | 5.7%         | 13.3%        | 5.3%         | 7.1%            | 12.0%        | 9.5%        | 9.7%         | 37.4%           |
| 40-54      | 2020 | 5.6%         | 12.7%        | 5.8%         | 6.8%            | 12.3%        | 9.2%        | 9.1%         | 38.5%           |
| 55+        | 693  | 5.2%         | <b>8.4%</b>  | 5.6%         | 8.2%            | 9.7%         | 8.7%        | 11.5%        | 42.7%           |

Bolded figures indicate groups where the proportion differed from the total population by: (a) 25% lower in relative terms (b) 50% higher in relative terms; (c) 5% absolute difference in either direction

**Figure S1.** Percent who received treatment versus those who self-reported needs (i.e. were flagged or unclassified) but did not receive treatment.

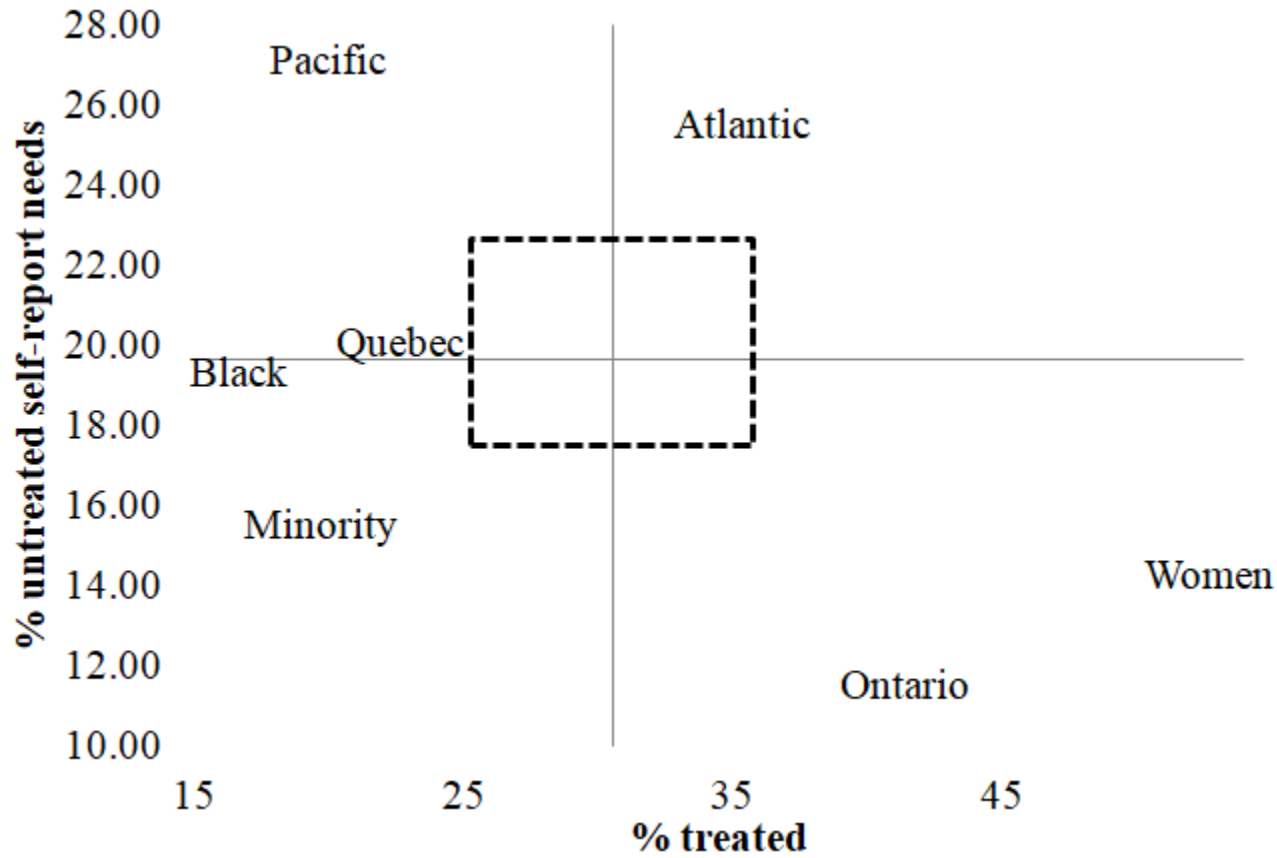

**Figure S2.** Observed treatment rates for those who were either flagged or unclassified on screening versus the expected rate (i.e. positive predictive value; depicted as a dashed line). Axes represent the overall treatment rates.

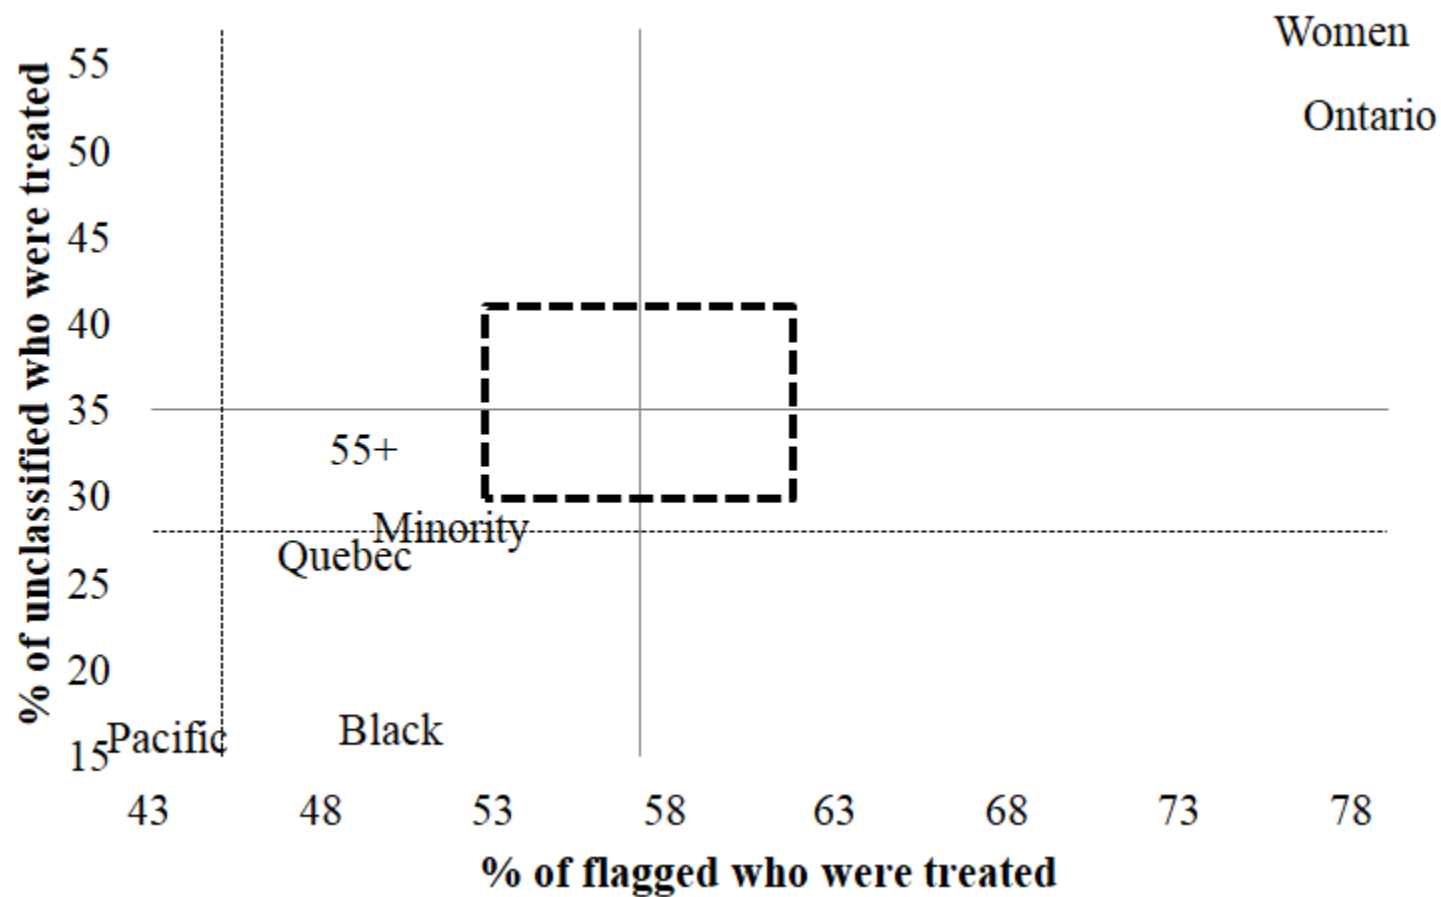

Supplement: Online_supplement.pdf [file Online_supplement.pdf]
